# Supplementary material for: Preparation of cation-exchange stir bar sorptive extraction based on monolithic material and its application to the analysis of soluble cations in milk by ion chromatography
Source: Royal Society of Chemistry journal article supplement (doi:10.1039/c1an15344g), 2011-01-01
Supplement: c1an15344g.pdf [file c1an15344g.pdf]

*Supporting information*

**Preparation of cationic exchange stir bar sorptive extraction based  
on poly (acrylic acid-ethylene dimethacrylate) monolith and its  
application to the analysis of soluble cations in milk by ion  
chromatography**

Xiaojia Huang<sup>\*</sup>, Jianbin Lin, Dongxing Yuan

1. *State Key Laboratory of Marine Environmental Science, Environmental Science  
Research Center, Xiamen University, Xiamen 361005, China*

### The Estimation of Cation-Exchange Capacity of monolith

The exchange capacity of the monolith was detected by  $\text{CuSO}_4$ . The monolith was dipped in 50 mM  $\text{CuSO}_4$  24 h, then dipped in water 4 h to remove the  $\text{CuSO}_4$  which was adsorbed by physical interaction. Finally, the monolith was immersed in 3 mL of 100 mM disodium ethylenediamine tetraacetate (EDTA) solution 24 h to release the  $\text{CuSO}_4$ . The absorbance of stripping solvent was detected at 288 nm and the absorption amount of  $\text{CuSO}_4$  on the monolith could be calculated from the standard calibration curve of Cu-EDMA. The desorption procedure can be repeated until no  $\text{CuSO}_4$  was detected.

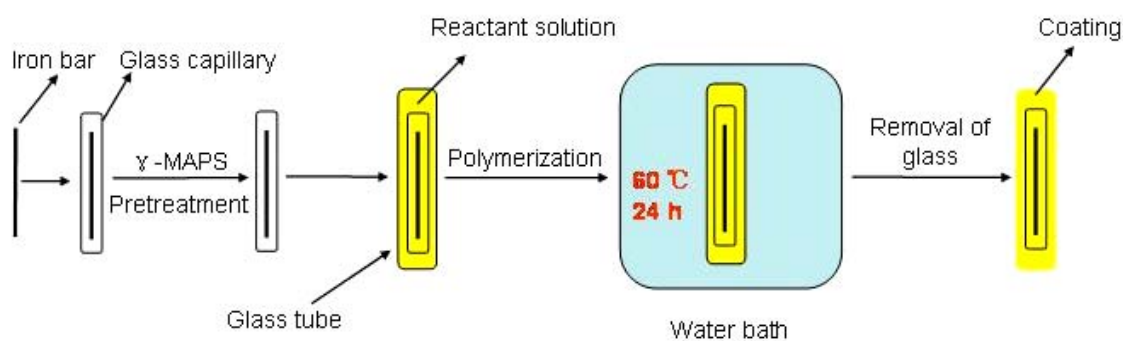

Fig.S1 The schematic diagram of the preparation of SBSE-CE

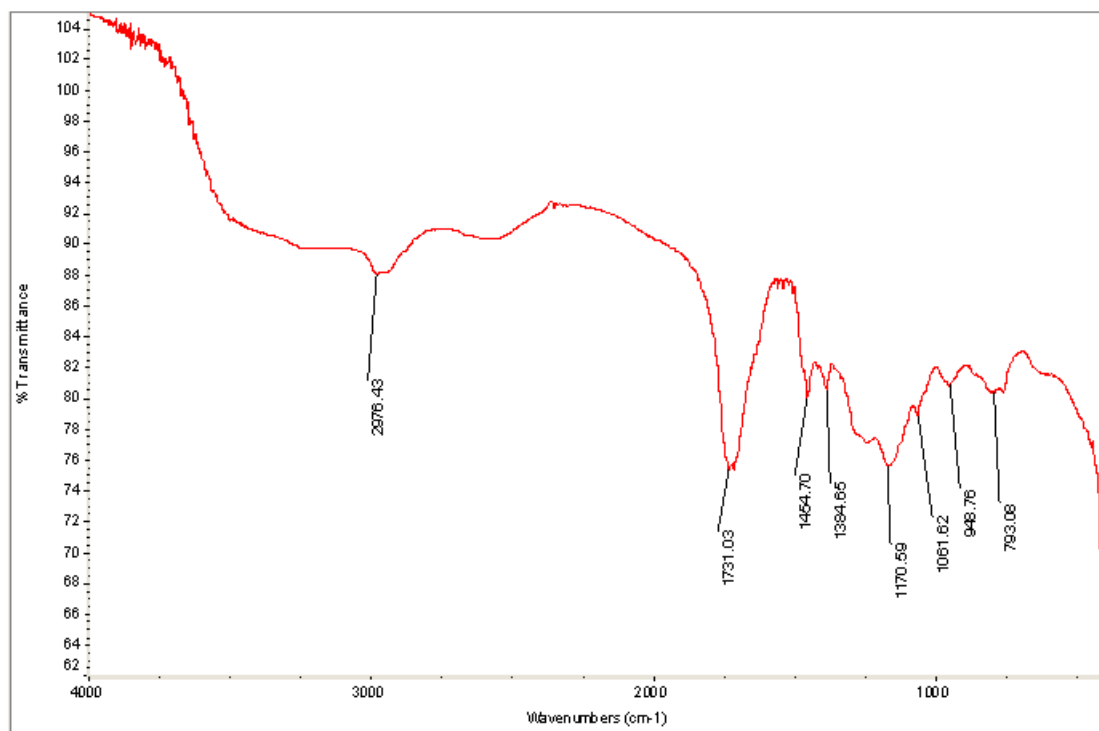

**Fig.S2.** The IR spectrum of poly (AC-EDMA)

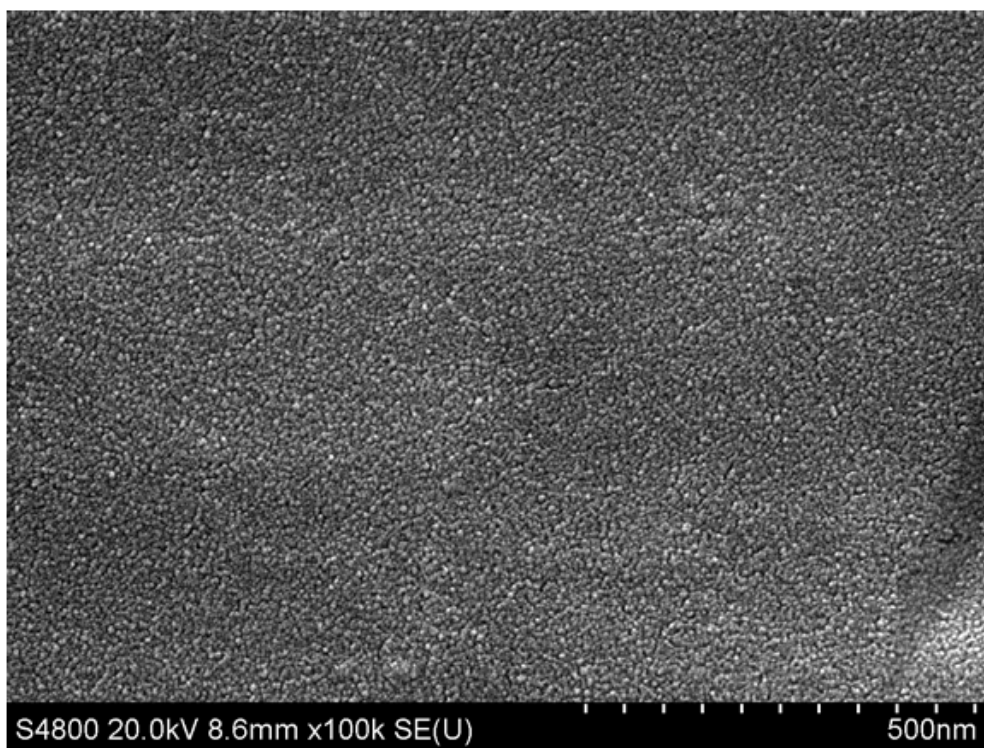

**Fig.S3.** SEM image of poly (AC-EDMA) monolith at 100000× magnification

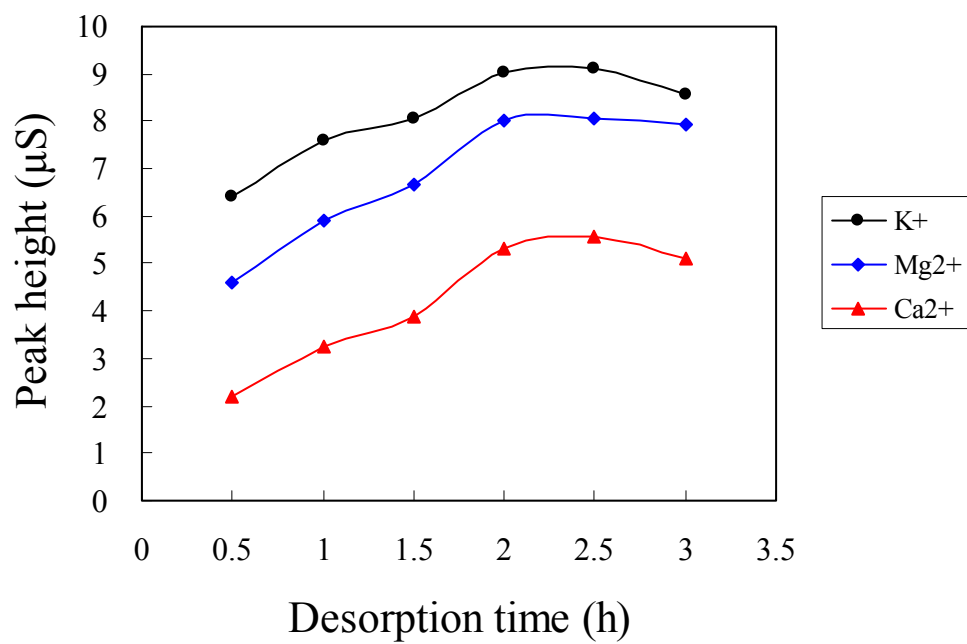

**Fig.S4.** The effect of desorption time on extraction efficiency.

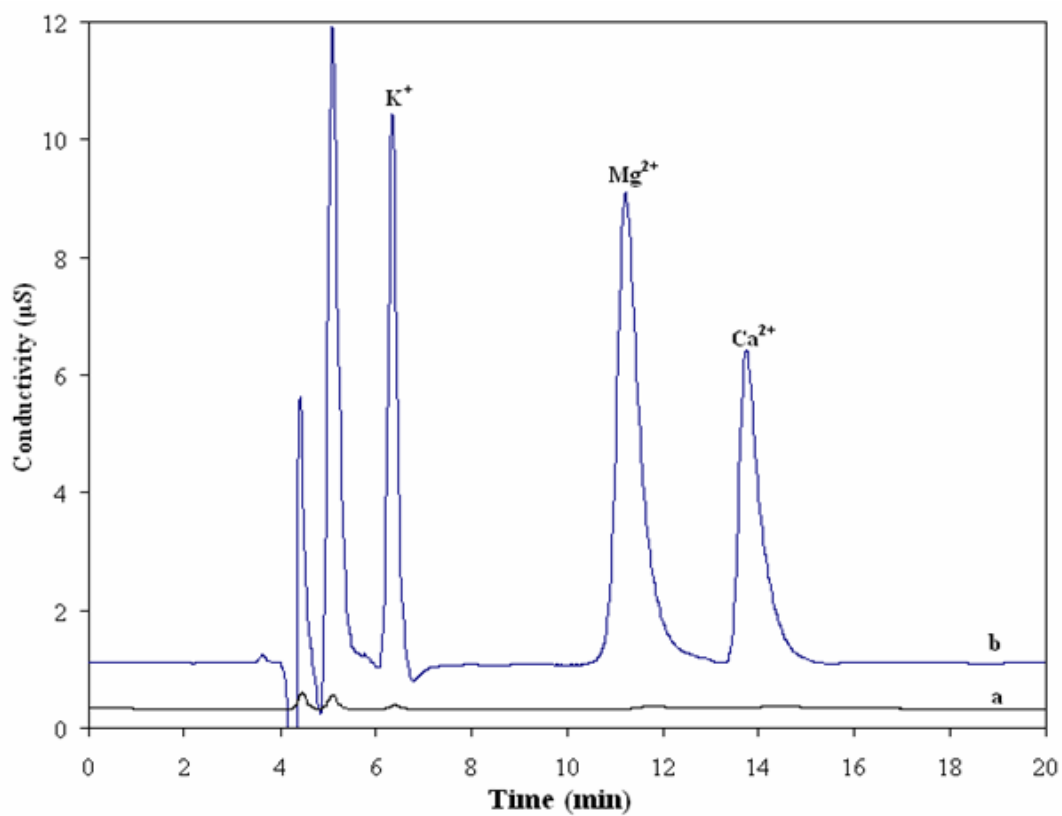

**Fig.S5.** IC chromatograms of three inorganic cations.

Direct injection of spiked milk sample with each cation at 50  $\mu\text{g/L}$  (after dilution) (a) and treated with SBSE-CE (b). The conditions were the same as in Fig.4.
